# Supplementary material for: Efficient aerobic oxidative esterification of furfural to methylfuroate over Au/Al2O3 catalysts in base-free medium
Source: Royal Society of Chemistry journal article supplement (doi:10.1039/d3nj05231a), 2024-01-01
Supplement: d3nj05231a1.pdf [file d3nj05231a1.pdf]

## Electronic Supplementary Information

*for*

### **High-efficiency oxidative esterification of furfural to methylfuroate over Au/Al<sub>2</sub>O<sub>3</sub> catalyst in base-free medium**

Junying Tian <sup>a</sup>, Xiaowei Cheng <sup>a</sup>, Guoqi Liu <sup>b</sup>, Zhiyong Ren <sup>b</sup>, Yifan Wang <sup>b</sup>, Tao Wei <sup>a</sup>, Dongqiang Zhang <sup>a</sup>, Yongle Guo <sup>a, \*</sup>

<sup>a</sup> School of Petrochemical Technology, Lanzhou University of Technology, Lanzhou 730050, Gansu, China

<sup>b</sup> Lanzhou Jinchuan Precious Metal Materials Co., Ltd. Lanzhou 730100, Gansu, China

\* Corresponding author, E-mail: [ylguo@lut.edu.cn](mailto:ylguo@lut.edu.cn)

## CAPTIONS

|                                                                                                                                                                                                                                                                                                          |    |
|----------------------------------------------------------------------------------------------------------------------------------------------------------------------------------------------------------------------------------------------------------------------------------------------------------|----|
| <b>Table S1</b> Some typical reports of catalytic selective oxidation of furfural with bases additive.....                                                                                                                                                                                               | S3 |
| <b>Table S2</b> Some typical reports of catalytic selective oxidation of furfural without bases additive.....                                                                                                                                                                                            | S4 |
| <b>Fig.S1</b> N <sub>2</sub> physisorption isotherms of (a) ZrO <sub>2</sub> and Au/ZrO <sub>2</sub> , (b) CeO <sub>2</sub> and Au/CeO <sub>2</sub> , (c) TiO <sub>2</sub> and Au/TiO <sub>2</sub> , (d) ZnO and Au/ZnO, (e) Al <sub>2</sub> O <sub>3</sub> and Au/Al <sub>2</sub> O <sub>3</sub> ... .. | S5 |
| <b>Fig.S2</b> XRD patterns of (a) ZrO <sub>2</sub> and Au/ZrO <sub>2</sub> , (b) CeO <sub>2</sub> and Au/CeO <sub>2</sub> , (c) TiO <sub>2</sub> and Au/TiO <sub>2</sub> , (d) ZnO and Au/ZnO, (e) Al <sub>2</sub> O <sub>3</sub> and Au/Al <sub>2</sub> O <sub>3</sub> .....                            | S6 |
| <b>Fig.S3</b> GC Chromatogram of products of a typical reaction.....                                                                                                                                                                                                                                     | S7 |
| <b>Fig.S4</b> XRD patterns of Au/Al <sub>2</sub> O <sub>3</sub> (fresh) and Au/Al <sub>2</sub> O <sub>3</sub> (used) catalysts.....                                                                                                                                                                      | S8 |

Table S1 Some typical reports of catalytic selective oxidation of furfural with base additive.

| Entry | Catalyst                                             | Condition                                                                                                                                                                                                     | Furfural Conversion (%) | MF Selectivity (%) | Ref. |
|-------|------------------------------------------------------|---------------------------------------------------------------------------------------------------------------------------------------------------------------------------------------------------------------|-------------------------|--------------------|------|
| 1     | 1%Au/TiO <sub>2</sub><br>+ CH <sub>3</sub> ONa       | Catalyst (0.25 g), furfural (4 mmol, 4 wt%), methanol (12.7 mL),<br>molar ratio Au/furfural/methanol = 1/300/23,000, 8% CH <sub>3</sub> ONa<br>relative to furfural, 22 °C, 0.1 MPa O <sub>2</sub> , 10–12 h. | ~100                    | ~100               | [8]  |
| 2     | 5%Au/ FH<br>+ K <sub>2</sub> CO <sub>3</sub>         | Catalyst (0.05 g), furfural (2.1 mmol, 1 wt%), methanol (15 mL),<br>K <sub>2</sub> CO <sub>3</sub> (0.05 g), molar ratio Au/furfural/methanol = 1/164/29,200,<br>140 °C, 0.3 MPa O <sub>2</sub> , 4 h.        | 93                      | 99                 | [9]  |
| 3     | 4.7%Au@U<br>iO-66+<br>K <sub>2</sub> CO <sub>3</sub> | Catalyst (0.025 g), furfural (1.0 mmol, 0.8 wt%), methanol (15 mL),<br>K <sub>2</sub> CO <sub>3</sub> (0.025g), molar ratio Au/furfural/methanol = 1/173/62,000,<br>140 °C, 0.3 MPa O <sub>2</sub> , 4 h.     | ~100                    | ~100               | [10] |

Table S2 Some typical reports of catalytic selective oxidation of furfural without base additive.

| Entry | Catalyst                | Condition                                                                                                                                                                            | Furfural Conversion (%) | MF Selectivity (%) | Ref. |
|-------|-------------------------|--------------------------------------------------------------------------------------------------------------------------------------------------------------------------------------|-------------------------|--------------------|------|
| 1     | 1.5%Au/ZrO <sub>2</sub> | Catalyst (0.1 g), furfural (3.6 mmol, 3 wt%), methanol (150 mL),<br>molar ratio Au/furfural/methanol = 1/500/5 × 10 <sup>5</sup> , 120 °C, 0.6 MPa O <sub>2</sub> , 3 h, 1000 rpm.   | 100                     | 98                 | [11] |
| 2     | 1.0%Au/ZrO <sub>2</sub> | Catalyst (0.1 g), furfural (3.6 mmol, 3 wt%), methanol (150 mL),<br>molar ratio Au/furfural/methanol = 1/500/5 × 10 <sup>5</sup> , 120 °C, 0.6 MPa O <sub>2</sub> , 1.5 h, 1000 rpm. | 82                      | 92                 | [12] |
| 3     | 1.5%Au/CeO <sub>2</sub> | Catalyst (0.1 g), furfural (3.6 mmol, 3 wt%), methanol (150 mL),<br>molar ratio Au/furfural/methanol = 1/500/5 × 10 <sup>5</sup> , 120 °C, 0.6 MPa O <sub>2</sub> , 1.5 h, 1000 rpm. | 74                      | 100                | [13] |
| 4     | 5%Au/CMK-3              | Catalyst (0.05 g), furfural (3.6 mmol, 2 wt%), methanol (20 mL),<br>molar ratio Au/furfural/methanol = 1/280/38,800, 120 °C, 1.5 MPa O <sub>2</sub> , 3 h.                           | 99.7                    | 99.6               | [14] |
| 5     | 2%Au/MgO                | Catalyst (0.1 g), furfural (0.05 mmol, 0.03 wt%), methanol (20 mL), molar ratio Au/furfural/methanol=1/50/50,000, 110 °C, 0.6 MPa O <sub>2</sub> , 2 h, 600 rpm.                     | 100                     | 95                 | [15] |
|       | 2%Au/CaO                |                                                                                                                                                                                      | 82                      | 67                 |      |
|       | 2%Au/SrO                |                                                                                                                                                                                      | 62                      | 45                 |      |
|       | 2%Au/BaO                |                                                                                                                                                                                      | 40                      | 38                 |      |

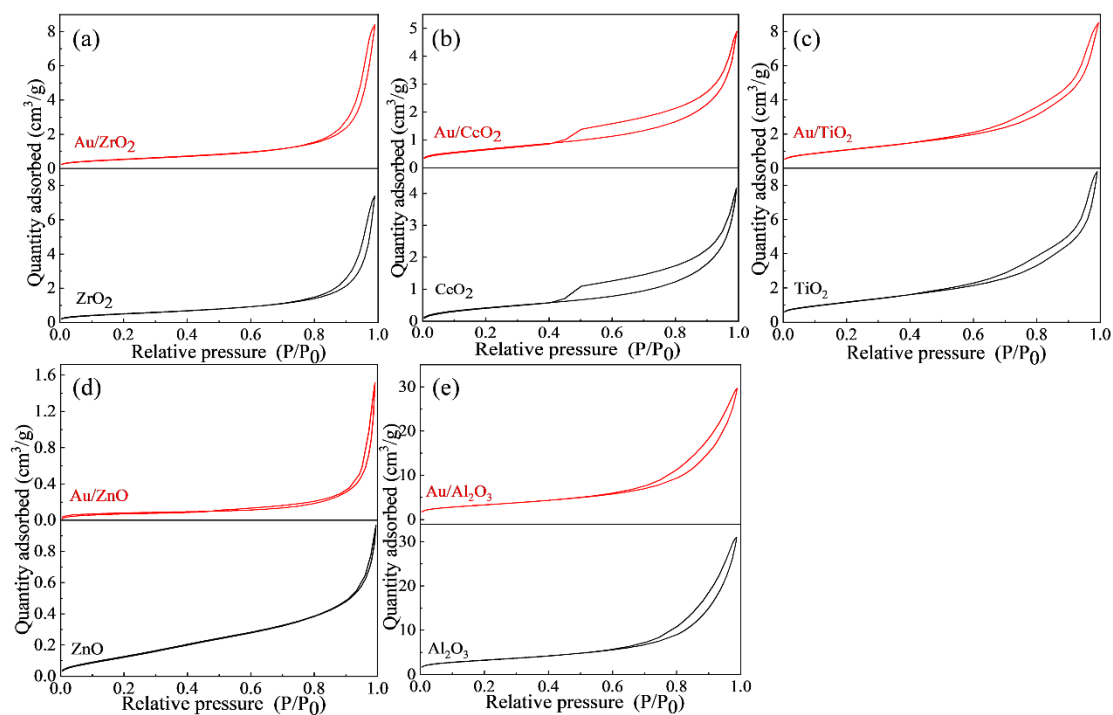

Fig.S1 N<sub>2</sub> physisorption isotherms of (a) ZrO<sub>2</sub> and Au/ZrO<sub>2</sub>, (b) CeO<sub>2</sub> and Au/CeO<sub>2</sub>, (c) TiO<sub>2</sub> and Au/TiO<sub>2</sub>, (d) ZnO and Au/ZnO, (e) Al<sub>2</sub>O<sub>3</sub> and Au/Al<sub>2</sub>O<sub>3</sub>.

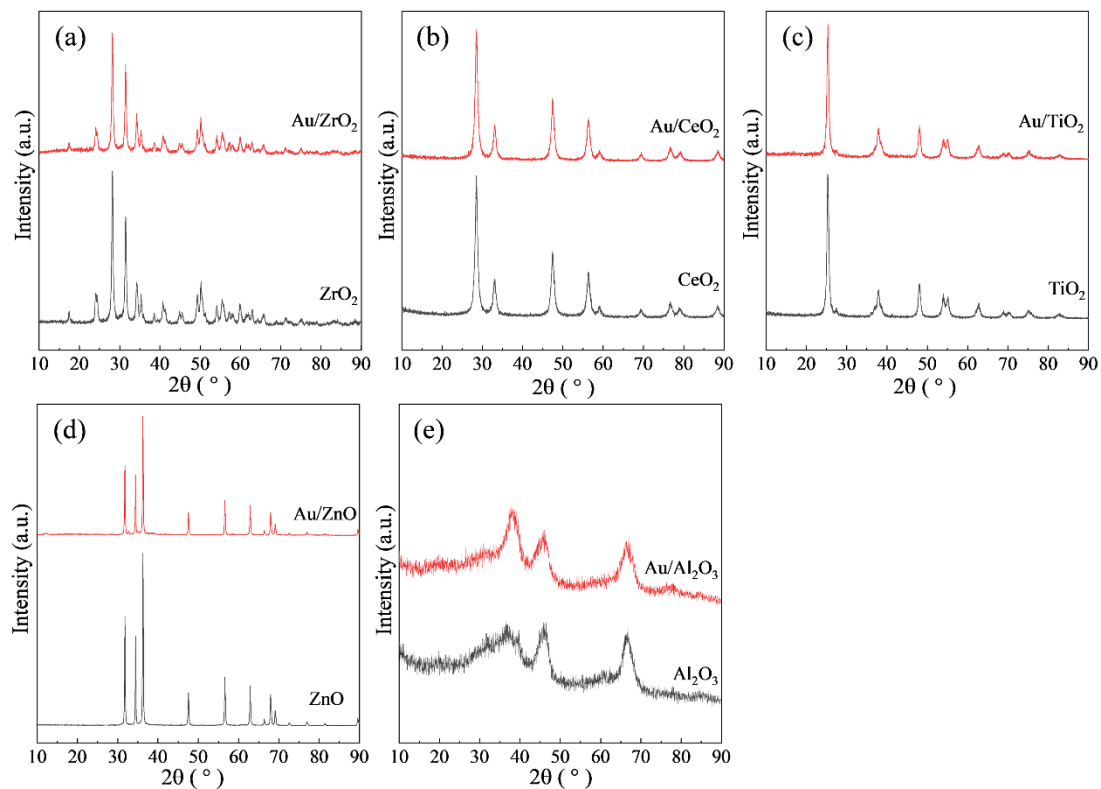

Fig.S2 XRD patterns of (a) ZrO<sub>2</sub> and Au/ZrO<sub>2</sub>, (b) CeO<sub>2</sub> and Au/CeO<sub>2</sub>, (c) TiO<sub>2</sub> and Au/TiO<sub>2</sub>, (d) ZnO and Au/ZnO, (e) Al<sub>2</sub>O<sub>3</sub> and Au/Al<sub>2</sub>O<sub>3</sub>.

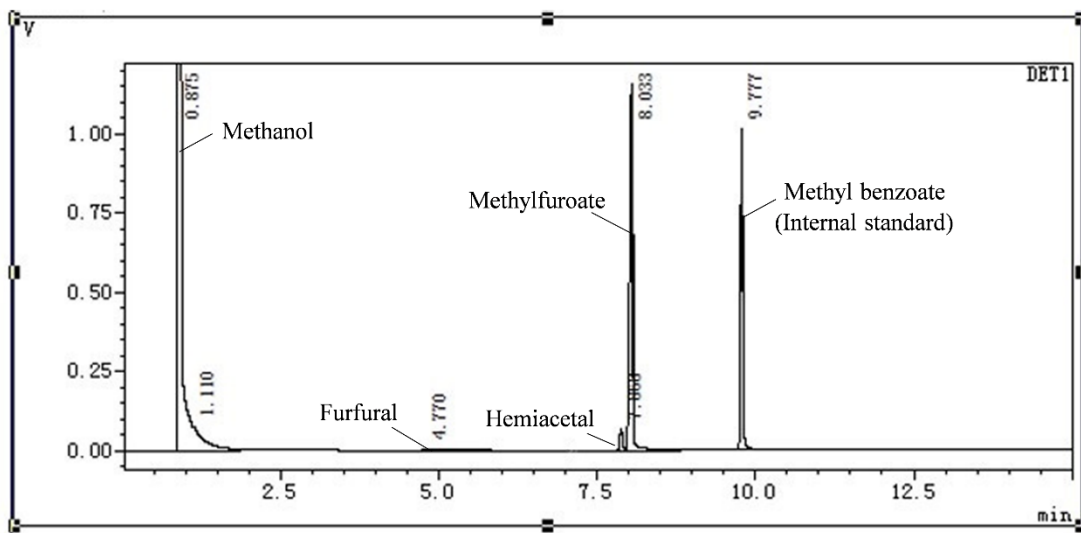

Fig.S3 GC Chromatogram of products of a typical reaction. Reaction conditions: furfural (1 g), catalyst (0.2 g), methanol (9 g), O<sub>2</sub> (1.0 MPa), 120°C and 1 h.

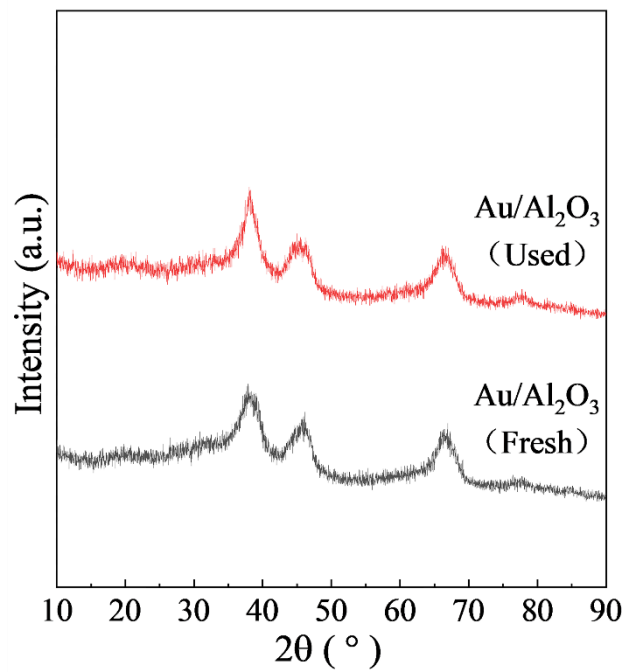

Fig.S4 XRD patterns of Au/Al<sub>2</sub>O<sub>3</sub>(fresh) and Au/Al<sub>2</sub>O<sub>3</sub>(used) catalysts.
